# Supplementary material for: A comprehensive optimization strategy: potassium phytate-doped SnO2 as the electron-transport layer for high-efficiency perovskite solar cells
Source: Royal Society of Chemistry journal article supplement (doi:10.1039/d2tc00882c), 2022-01-01
Supplement: d2tc00882c1.pdf [file d2tc00882c1.pdf]

## Supporting Information

# **A Comprehensive Optimization Strategy: Potassium Phytate-Doped SnO<sub>2</sub> as Electron-Transporting Layer for High-Efficiency Perovskite Solar Cells**

*Dengjie Zhao,<sup>a</sup> Chenxi Zhang,<sup>a\*</sup> Min Zhao<sup>b</sup>, Jingkun Ren<sup>a</sup>, Zhen Dai<sup>a</sup>, Yukun Wu,<sup>a</sup> Qinjun Sun<sup>a</sup>,  
Yanxia Cui,<sup>a</sup> Yuying Hao<sup>a\*</sup>*

*<sup>a</sup>College of Physics and Optoelectronics, Key Lab of Advanced Transducers and Intelligent Control System, Taiyuan University of Technology, Taiyuan 030024, China.*

*<sup>b</sup>Key Laboratory of Interface Science and Engineering in Advanced Materials, Ministry of Education, Taiyuan University of Technology, Taiyuan, 030024, China*

*\*Corresponding author. E-mail address: zhangchenxi@tyut.edu.cn, haoyuying@tyut.edu.cn*

---

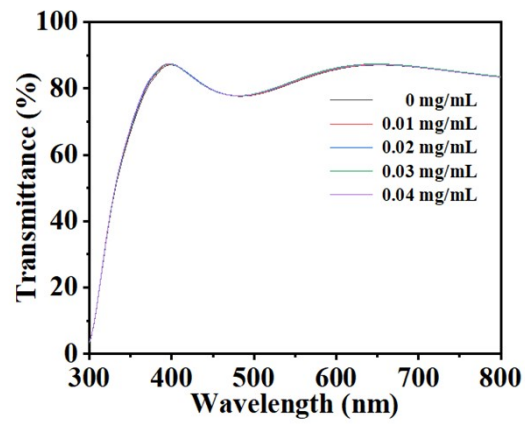

**Fig. S1.** Transmittance spectra of SnO<sub>2</sub> ETLs made with PP of different concentrations.

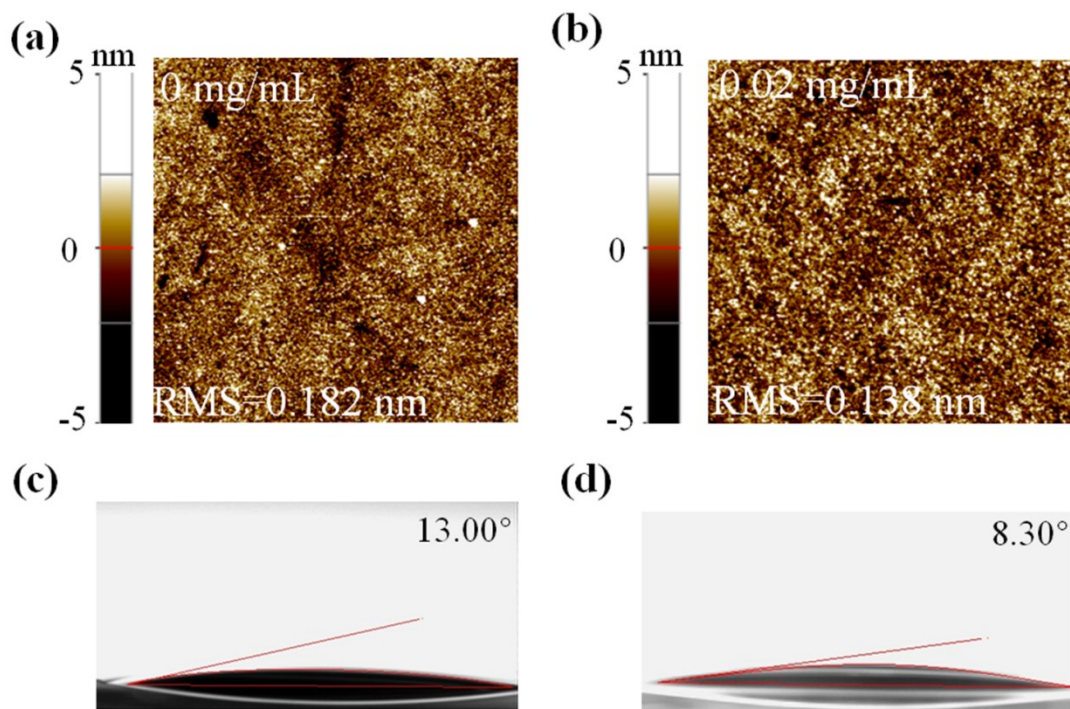

**Fig. S2.** AFM images of (a) SnO<sub>2</sub> and (b) PP-doped SnO<sub>2</sub> films, and the water contact angle images of (c) SnO<sub>2</sub> and (d) PP-doped SnO<sub>2</sub> films.

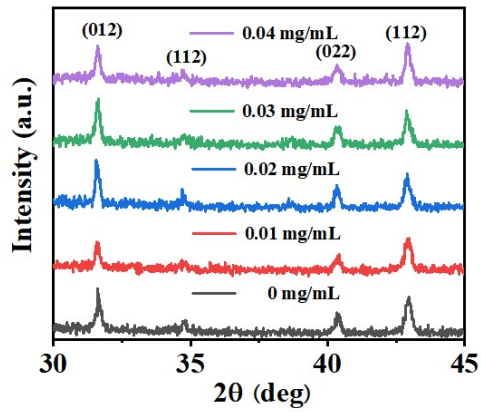

**Fig. S3.** (a) Magnified XRD patterns of SnO<sub>2</sub> films doped with different concentrations of PP.

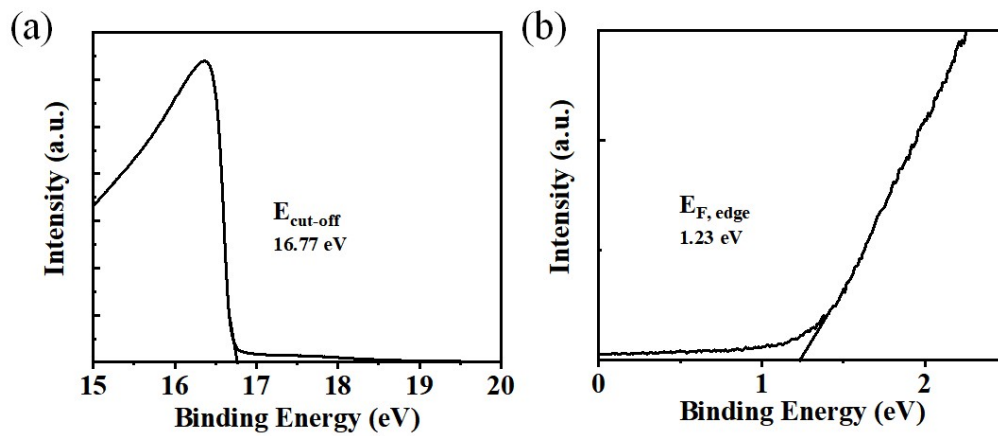

**Fig. S4.** UPS spectra describing (a) the cut-off energy ( $E_{\text{cut-off}}$ ) and (b) Fermi edge ( $E_{\text{F, edge}}$ ) for perovskite film.

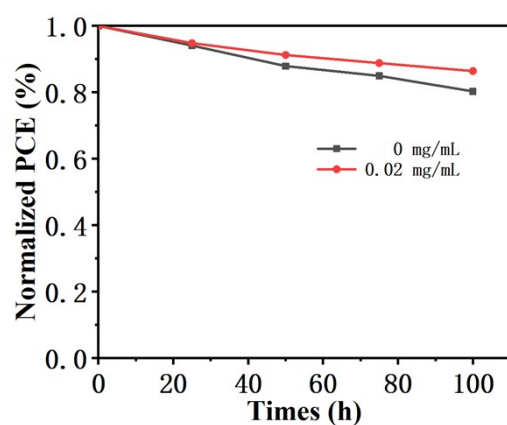

**Fig. S5.** The photostability performance of the PSCs under continuous maximum power point tracking (MPPT) for 100 hours under nitrogen gas conditions with continuous full-sun illumination (1 sun, 100 mW cm<sup>2</sup>).

**Table S1.** Conductivities of PP doped SnO<sub>2</sub> with different doping concentrations.

| ETL                                      | 0mg/mL | 0.01mg/mL | 0.02mg/mL | 0.03mg/mL | 0.04mg/mL |
|------------------------------------------|--------|-----------|-----------|-----------|-----------|
| Conductivity<br>( $\times 10^{-5}$ S/cm) | 3.57   | 4.33      | 5.10      | 5.68      | 4.55      |

**Table S2.** O 1s XPS peaks of SnO<sub>2</sub> films treated without or with PP of 0.02 mg/mL.

| Samples    | Area ratio                  |                             |                             |                             |
|------------|-----------------------------|-----------------------------|-----------------------------|-----------------------------|
|            | 529.33<br>( $\pm 0.06$ ) eV | 530.20<br>( $\pm 0.04$ ) eV | 531.48<br>( $\pm 0.00$ ) eV | 531.77<br>( $\pm 0.03$ ) eV |
| 0 mg/mL    | 4.03                        | 75.88                       | 0                           | 20.09                       |
| 0.02 mg/mL | 2.42                        | 63.53                       | 11.93                       | 22.12                       |

**Table S3.** Sn 3d<sub>5/2</sub> XPS peaks of SnO<sub>2</sub> films treated without or with PP of 0.02 mg/mL.

| Area ratio<br>Samples | 486.60<br>(±0.07) eV | 486.10<br>(±0.07) eV | 484.90<br>(±0.00) eV |
|-----------------------|----------------------|----------------------|----------------------|
| 0 mg/mL               | 21.44                | 74.42                | 4.14                 |
| 0.02 mg/mL            | 16.12                | 83.65                | 0.23                 |

**Table S4.** PL delay lifetime fitted by a bi-exponential decay function.

| Concentration<br>(mg/mL) | $\tau_1$<br>(ns) | $A_1$<br>(%) | $\tau_2$<br>(ns) | $A_2$<br>(%) |
|--------------------------|------------------|--------------|------------------|--------------|
| 0                        | 312.78           | 27.05        | 1233.51          | 72.95        |
| 0.01                     | 170.62           | 26.50        | 1535.57          | 73.50        |
| 0.02                     | 143.16           | 26.24        | 1795.76          | 73.76        |
| 0.03                     | 170.30           | 26.16        | 1574.62          | 73.84        |
| 0.04                     | 174.24           | 32.49        | 1383.26          | 67.51        |

**Table S5.** Fitted electrical property data using the equivalent circuit shown in the inset of Figure 9a for each kind of device.

| Concentration<br>(mg/mL) | $R_s$<br>(ohm) | $R_{rec}$<br>(ohm) |
|--------------------------|----------------|--------------------|
| 0                        | 76.24          | 6265               |
| 0.01                     | 79.20          | 9562               |
| 0.02                     | 40.34          | 10670              |
| 0.03                     | 46.80          | 7450               |
| 0.04                     | 46.46          | 7049               |

**Table S6.** Performance parameters of PSCs with different concentration of PP doped in SnO<sub>2</sub>, the average parameters were obtained based on twenty devices for each kind.

| Concentration<br>(mg/mL) | Voc<br>(V) | Jsc<br>(mA/cm <sup>2</sup> ) | FF        | PCE<br>(%) |
|--------------------------|------------|------------------------------|-----------|------------|
| 0                        | 1.11±0.02  | 24.54 ±0.29                  | 0.72±0.02 | 19.53±0.35 |
| 0.01                     | 1.12±0.02  | 24.74 ±0.27                  | 0.75±0.01 | 20.75±0.63 |
| 0.02                     | 1.14±0.01  | 24.85 ±0.27                  | 0.76±0.01 | 21.49±0.39 |
| 0.03                     | 1.13±0.01  | 24.71 ±0.20                  | 0.75±0.01 | 20.73±0.39 |
| 0.04                     | 1.12±0.01  | 24.41 ±0.50                  | 0.73±0.01 | 19.99±0.53 |
